# Supplementary material for: A screen for inducers of bHLH activity identifies pitavastatin as a regulator of p21, Rb phosphorylation and E2F target gene expression in pancreatic cancer
Source: PubMed Central journal article supplement (PMC5581100; doi:10.18632/oncotarget.18587), 2017-06-21
Supplement: oncotarget-08-53154-s001.pdf [file oncotarget-08-53154-s001.pdf]

## A screen for inducers of bHLH activity identifies pitavastatin as a regulator of p21, Rb phosphorylation and E2F target gene expression in pancreatic cancer

### SUPPLEMENTARY FIGURES AND TABLE

**AGATCTAGAACACCTGCAGCAGCTGGCAGGGAT**  
**CTGGTCATGTGGCAAGGCTATTTGGGATCTAGAA**  
**CACCTGCAGCAGCTGGCAGGGATCTGGTCATGTG**  
**GCAAGGCTATTTGGGATCTAGAACACCTGCAGCA**  
**GCTGGCAGGGATCTGGTCATGTGGCAAGGCTATT**  
**TGGGATCTAGAACACCTGCAGCAGCTGGCAGGG**  
**ATCTGGTCATGTGGCAAGGCTATTTGGGATCCACT**  
**AGTTCTAGAGGATCCGCCGCGGCCGCCTTTATAA**  
**GGCGGCGGGGGTGGTGGCCCGGGCCGCGTTGCG**  
**CTCCCGCCACTCCGCGCCCGCTATCCTGGCTCCGTG**  
**CTCCCACGCGCTTGTGCCTGGACGGACCAAGCTT**  
**GGAATTCCTTTGTGTTACATTCTTGAATGTCGCTCG**  
**CAGTGACATTAGCATTCCGGTACTGTTGGTAAAAT**  
**G**

**Supplementary Figure 1: E-box reporter sequence.** The reporter sequence beginning with the BglII/NotI insert containing 4 copies of ligated XbaI fragments, each containing 3 E-boxes ( $\mu$ E5/ $\mu$ E2/ $\mu$ E3) from the mouse immunoglobulin heavy chain gene (in boldface), and ending with ATG from luciferase cassette.

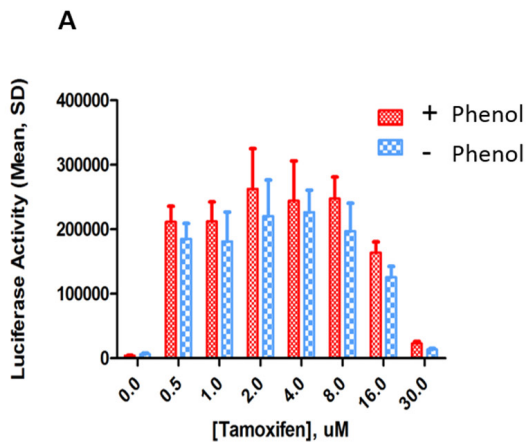

**B**

| Cell No. | RPMI only | No Tamoxifen |        |        | Tamoxifen 4uM |         |           |
|----------|-----------|--------------|--------|--------|---------------|---------|-----------|
|          | 0         | 5,000        | 7,500  | 10,000 | 5,000         | 7,500   | 10,000    |
| A        | 280       | 3,000        | 5,120  | 14,600 | 400,520       | 619,960 | 794,440   |
| B        | 280       | 3,840        | 5,040  | 20,040 | 496,920       | 513,480 | 1,346,480 |
| C        | 280       | 5,200        | 8,720  | 14,600 | 464,600       | 773,040 | 1,191,200 |
| D        | 320       | 3,520        | 4,640  | 7,120  | 298,280       | 594,640 | 821,160   |
| E        | 280       | 3,440        | 6,840  | 7,640  | 352,920       | 430,360 | 1,046,280 |
| F        | 280       | 3,840        | 7,280  | 9,040  | 458,800       | 651,840 | 1,056,840 |
| G        | 320       | 2,840        | 6,680  | 9,640  | 668,200       | 519,520 | 1,192,080 |
| H        | 360       | 3,920        | 6,560  | 9,600  | 295,880       | 638,720 | 1,044,000 |
| I        | 320       | 5,200        | 9,040  | 10,120 | 528,760       | 515,040 | 908,600   |
| J        | 440       | 3,680        | 5,360  | 9,840  | 560,920       | 664,920 | 965,840   |
| K        | 280       | 3,040        | 8,040  | 8,800  | 611,800       | 520,760 | 1,100,400 |
| L        | 320       | 5,240        | 4,840  | 9,560  | 515,320       | 730,120 | 792,040   |
| M        | 400       | 3,520        | 11,120 | 8,920  | 444,880       | 786,680 | 1,247,360 |
| N        | 280       | 5,560        | 6,280  | 8,600  | 287,240       | 602,080 | 780,440   |
| O        | 280       | 10,800       | 7,600  | 14,960 | 550,080       | 732,840 | 1,034,280 |
| P        | 320       | 2,400        | 8,080  | 16,120 | 634,560       | 704,320 | 378,040   |
| Mean     | 0         | 4,000        | 6,638  | 10,885 | 472,790       | 624,580 | 980,903   |
| SD       | 48        | 1,971        | 1,787  | 3,670  | 121,038       | 105,010 | 235,181   |
| Z-factor |           | 0.213        | 0.482  | 0.261  |               |         |           |

**Supplementary Figure 2: Assay optimization.** (A) Dose responsive luciferase activity (0 to 30  $\mu$ M tamoxifen for 48 hours) was determined in PANC1/E47<sup>MER</sup> cells transfected with the E-box-luc reporter. The possibility of phenol red interference with luciferase signal was also investigated. (B) To optimize cell density in a 384 well format, a Z' was calculated for PANC1/E47<sup>MER</sup> cells expressing the luciferase reporter, plated at 5000 to 10,000 cells per well +/- 4uM tamoxifen.

|   | P1E47  | P1   | P1   | P1   | P1   | P1   | P1   | P1   | P1   | P1   | P1   | P1   | P1   | P1   | P1   | P1   | P1   | P1   | P1   | P1   | P1   | P1   | P1   |
|---|--------|------|------|------|------|------|------|------|------|------|------|------|------|------|------|------|------|------|------|------|------|------|------|
|   | WT     | DMSO | DMSO | DMSO | DMSO | DMSO | DMSO | DMSO | DMSO | DMSO | DMSO | DMSO | DMSO | DMSO | DMSO | DMSO | DMSO | DMSO | DMSO | DMSO | DMSO | DMSO | DMSO |
|   | 1      | 2    | 3    | 4    | 5    | 6    | 7    | 8    | 9    | 10   | 11   | 12   | 13   | 14   | 15   | 16   | 17   | 18   | 19   | 20   | 21   | 22   | 23   |
| A | 599395 | 3910 | 2815 | 3540 | 3630 | 2535 | 2320 | 3420 | 2325 | 2340 | 2650 | 1825 | 2645 | 2110 | 2620 | 2715 | 2275 | 2355 | 2185 | 2590 | 2535 | 2895 | 2185 |
| B | 638920 | 3135 | 2090 | 1885 | 2605 | 2405 | 2875 | 2370 | 2345 | 1920 | 2555 | 2355 | 2575 | 1995 | 2400 | 2275 | 2285 | 1970 | 2265 | 2035 | 2020 | 1745 | 2005 |
| C | 524760 | 4185 | 2445 | 2925 | 3345 | 2435 | 2650 | 2195 | 1935 | 2135 | 2490 | 1810 | 1935 | 2215 | 2200 | 2045 | 2595 | 1685 | 2665 | 2890 | 2740 | 2345 | 2405 |
| D | 435370 | 2925 | 3105 | 2400 | 3140 | 2325 | 2425 | 2780 | 1720 | 2425 | 2000 | 2470 | 2465 | 2620 | 2225 | 2550 | 2210 | 2795 | 1900 | 2100 | 1720 | 2065 | 2210 |
| E | 515550 | 2795 | 3740 | 3255 | 2800 | 2815 | 2680 | 2105 | 2520 | 2685 | 3570 | 2795 | 2130 | 2070 | 2505 | 2270 | 2225 | 2005 | 2620 | 2410 | 2135 | 2640 | 2645 |
| F | 713645 | 2965 | 2670 | 3450 | 3200 | 2880 | 2180 | 2945 | 2320 | 3005 | 1810 | 2095 | 2030 | 2725 | 2365 | 3395 | 2700 | 1845 | 2150 | 2045 | 2185 | 1685 | 1625 |
| G | 604005 | 3890 | 3750 | 2860 | 3165 | 3420 | 3270 | 2300 | 2000 | 2185 | 2255 | 1960 | 2710 | 2755 | 2580 | 1960 | 3480 | 2105 | 2115 | 1805 | 2620 | 2510 | 2110 |
| H | 558420 | 4045 | 2210 | 3480 | 3115 | 2395 | 2980 | 2885 | 2500 | 2905 | 2550 | 2165 | 2465 | 2775 | 2965 | 2355 | 2845 | 1960 | 3015 | 2205 | 2170 | 2075 | 2285 |
| I | 602790 | 4415 | 3270 | 2645 | 3070 | 3215 | 2535 | 2410 | 2010 | 2385 | 1755 | 2380 | 2420 | 2595 | 2855 | 2680 | 2425 | 2440 | 2255 | 2585 | 2205 | 2065 | 1810 |
| J | 556825 | 4150 | 3380 | 3000 | 2735 | 2910 | 2495 | 3120 | 2320 | 2880 | 2115 | 2015 | 2405 | 2765 | 2755 | 2525 | 2685 | 2545 | 2255 | 2130 | 2590 | 1945 | 2455 |
| K | 669390 | 4435 | 3410 | 2465 | 2875 | 2490 | 2470 | 3230 | 2570 | 2440 | 2525 | 2100 | 2220 | 2470 | 2170 | 2425 | 2645 | 3355 | 2270 | 2495 | 2030 | 2150 | 1575 |
| L | 700325 | 4450 | 2740 | 3225 | 2145 | 3120 | 2200 | 2170 | 3545 | 2075 | 1950 | 2175 | 2050 | 2685 | 2790 | 2475 | 3100 | 2190 | 2790 | 2350 | 2430 | 2510 | 2465 |
| M | 637945 | 3985 | 3255 | 2880 | 2550 | 3035 | 2875 | 2335 | 2460 | 2705 | 1880 | 2060 | 2360 | 2210 | 2525 | 1945 | 3265 | 2480 | 2795 | 2450 | 2405 | 1920 | 1980 |
| N | 673125 | 3075 | 3265 | 2750 | 2020 | 2735 | 2395 | 3710 | 1920 | 2665 | 2175 | 1740 | 2940 | 3120 | 2730 | 2000 | 3170 | 1790 | 1595 | 2170 | 2375 | 2285 | 2300 |
| O | 743540 | 3325 | 3700 | 2530 | 3395 | 2390 | 3445 | 2755 | 2255 | 3290 | 2340 | 1835 | 2315 | 2530 | 1960 | 2245 | 3255 | 3880 | 2450 | 2395 | 2580 | 2550 | 2390 |
| P | 708970 | 2665 | 2445 | 1855 | 2675 | 1770 | 1865 | 1815 | 1705 | 2085 | 1580 | 2460 | 2010 | 1960 | 1845 | 2050 | 2475 | 2130 | 2130 | 2375 | 1890 | 2485 | 1555 |

**Supplementary Figure 3: Z factor determination.** Parental PANC1 cells (P1) expressing E-box-luc were plated in 352 wells of a 384 well plate and treated with DMSO (negative control). PANC1/E47<sup>MER</sup> cells (P1/E47) expressing E-box-luc were plated in 16 wells of the plate and treated with 4 μM tamoxifen as a positive control. Luciferase was assayed following 48 hours of incubation.

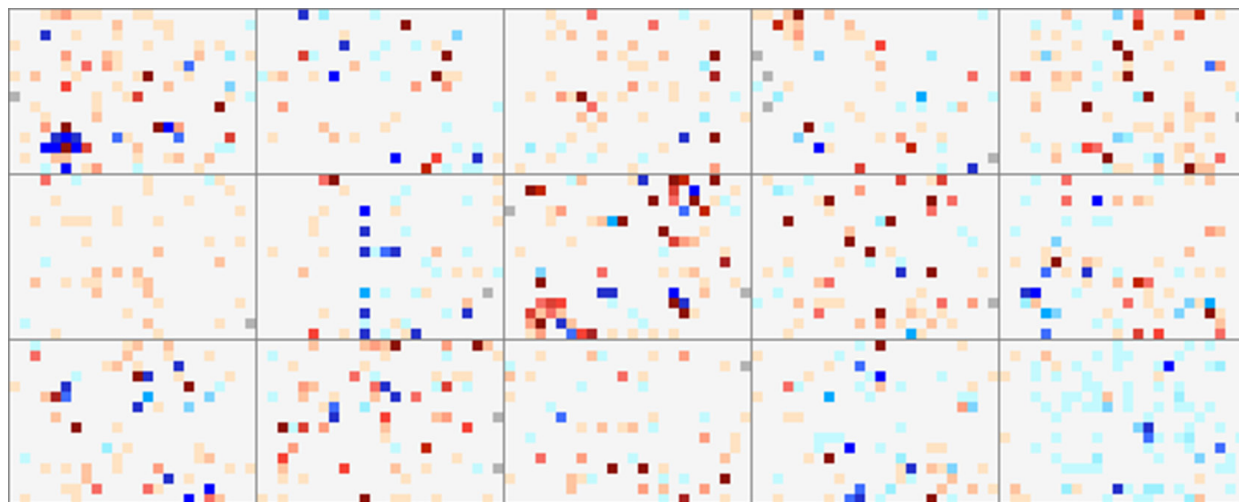

**Supplementary Figure 4: Plate distribution of hits.** Hits (red pixels) from a screen of 4375 pharmaceuticals were distributed across 14 of 15 plates. The highest Z scores are in dark red (29.52) and the lowest are in dark blue (-8.77).

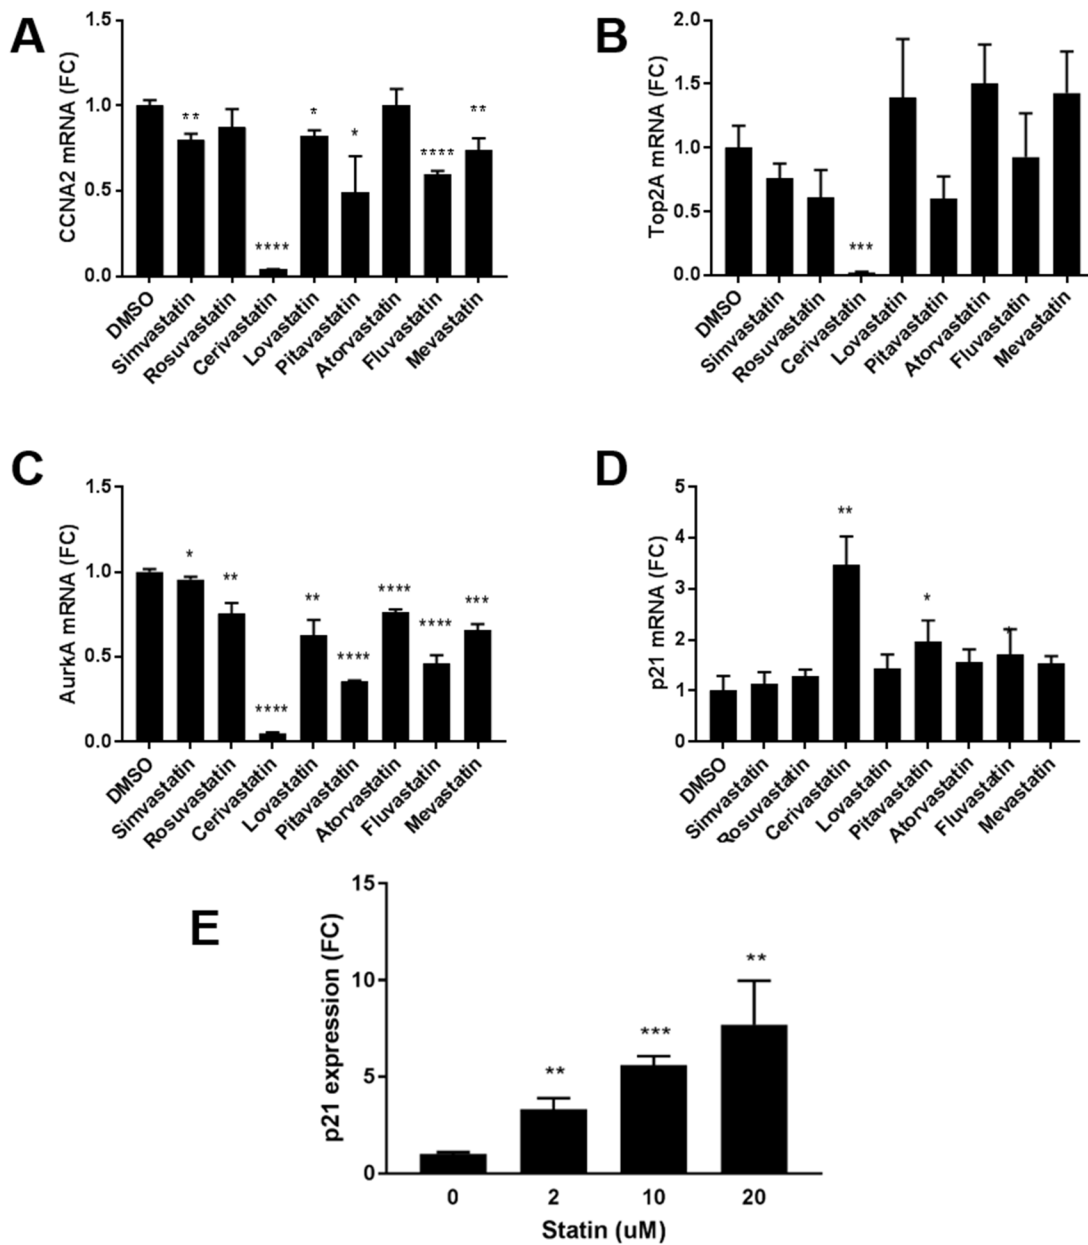

**Supplementary Figure 5: Statins regulate expression of cell cycle related genes at 5μM.** PANC1 cells were treated with 5 μM of each of the 9 statins for 48 hours. RT-qPCR data is shown for: (A) CCNA2, (B) TOP2A, (C) AURKA and (D) p21 as fold change (FC) over DMSO treated cells. (E) P21 induction is dose responsive. Data are represented as mean +/-SD, \*p≤0.05, \*\*p≤0.01, \*\*\*p≤0.001, \*\*\*\*p≤0.0001.

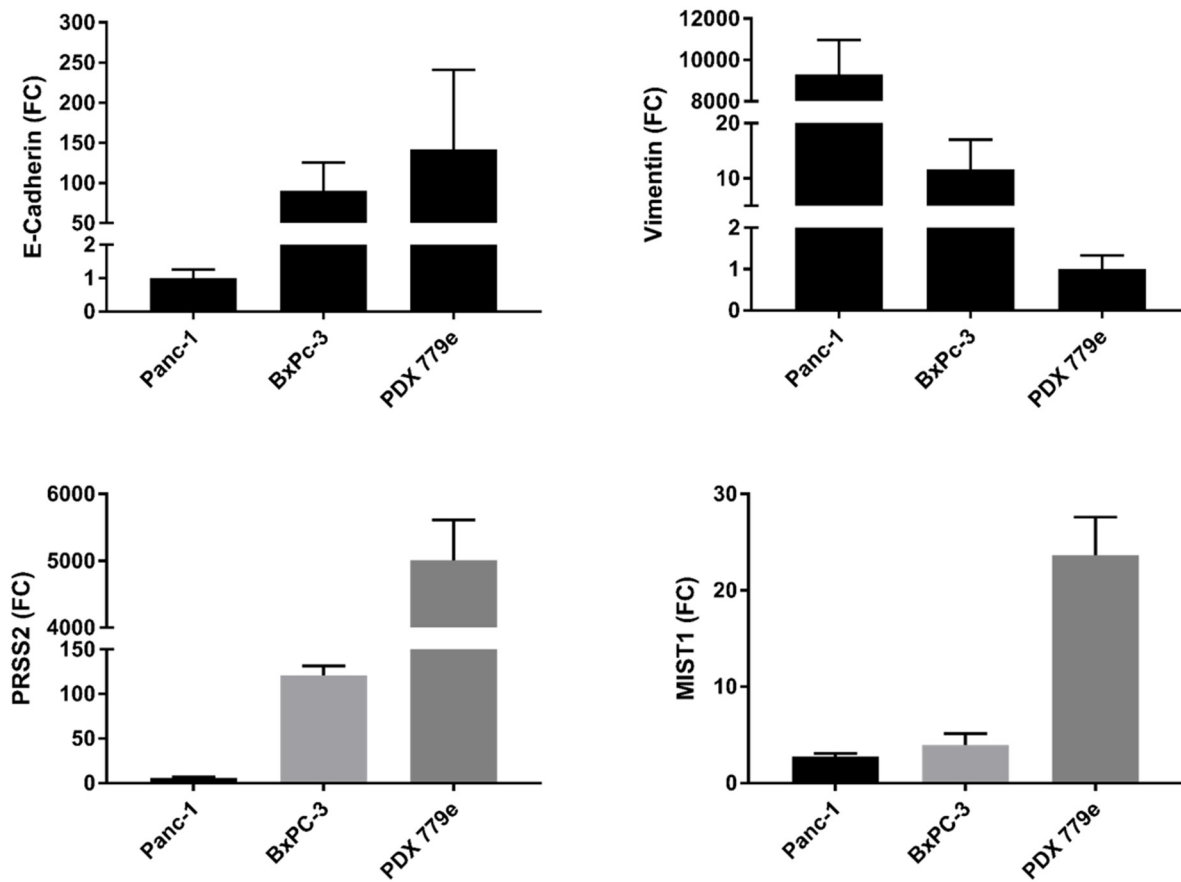

**Supplementary Figure 6: Cell line characterization.** The baseline mRNA expression levels of E-cadherin, vimentin, Trypsin 2 (PRSS2) and MIST1 in parental PANC1, BxPC3 and 779e cells as measured by PCR. All values were first normalized to 18s and then one cell line was set at 1 for each gene. Data are represented as mean +/-SD.

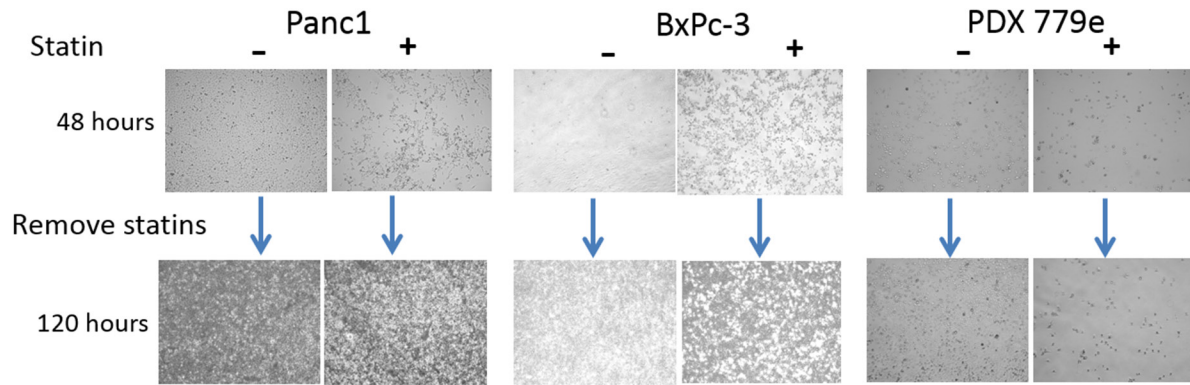

**Supplementary Figure 7: Proliferation following removal of pitavastatin.** In a “washout” experiment, cells were treated with pitavastatin for 48 hours after which they were washed and cultured in basal media without drug for 72 hours. Bright field images are 50x original.

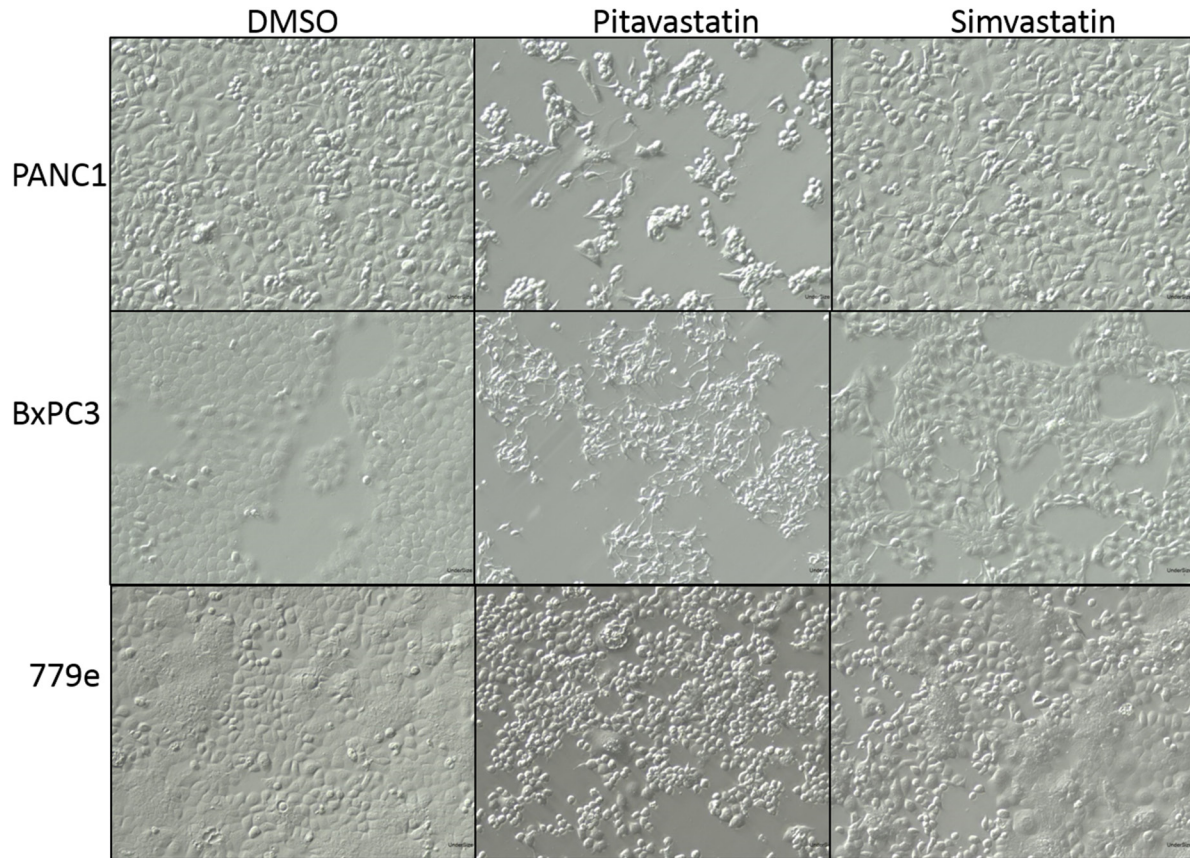

**Supplementary Figure 8: Cytoskeletal alterations in simvastatin versus pitavastatin treated PDA cells.** Treatment of BxPC3, PANC1 and 779e cells 10  $\mu$ M simvastatin for 48 hours does not induce cytoskeletal alterations compared with 10  $\mu$ M pitavastatin. Bright field images are 100X original.



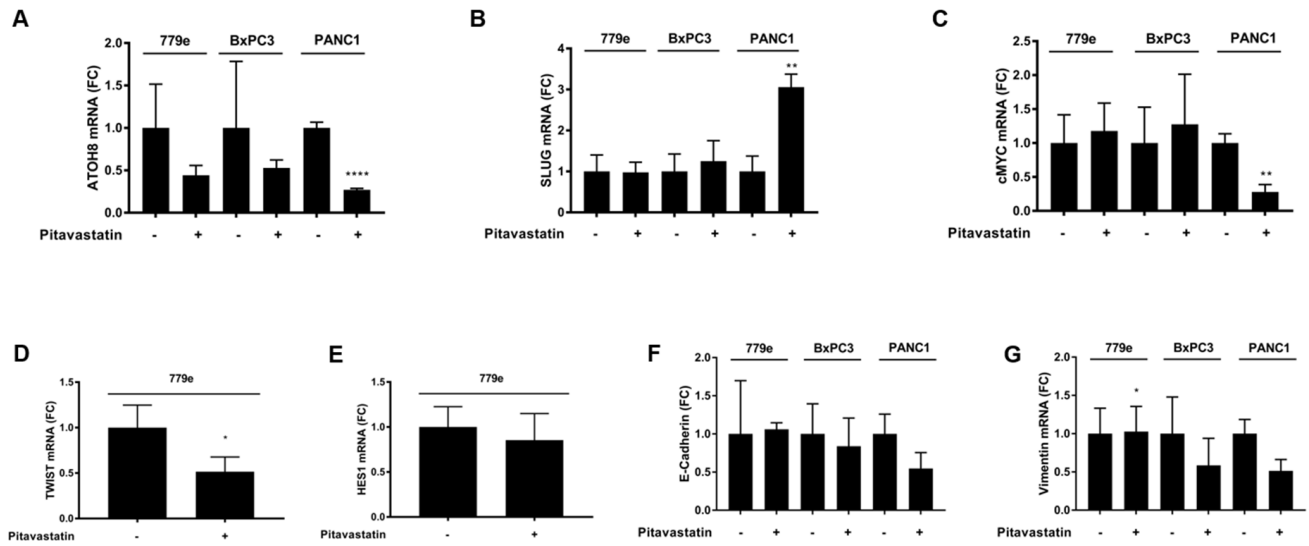

**Supplementary Figure 9: Pitavastatin induced expression of bHLH factors and EMT markers.** PANC1, BxPC3, and 779e cells were treated with 10  $\mu$ M pitavastatin for 48 hours and mRNA expression was measured by PCR for (A) Atoh 8, (B) SLUG, (C) cmyc. Only 779e cells exhibited expression of (D) Twist and (E) Hes1. Pitavastatin did not alter expression of (F) E-cadherin or (G) vimentin in the 3 lines.

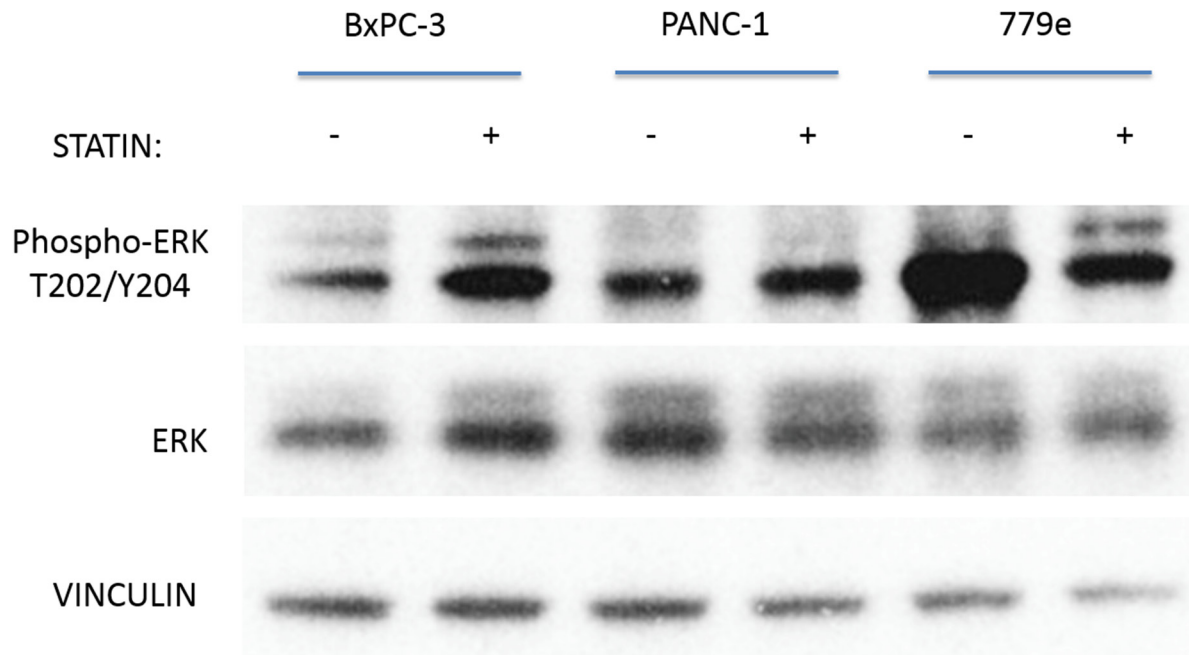

**Supplementary Figure 10: Pitavastatin effects on ERK1/2 phosphorylation.** PANC1, BxPC3, and 779e cells were treated with 10  $\mu$ M pitavastatin for 48 hours after which they were harvested for Western blots of Phospho-ERK1/2 (T202/Y204), total ERK1/2 protein and vinculin.

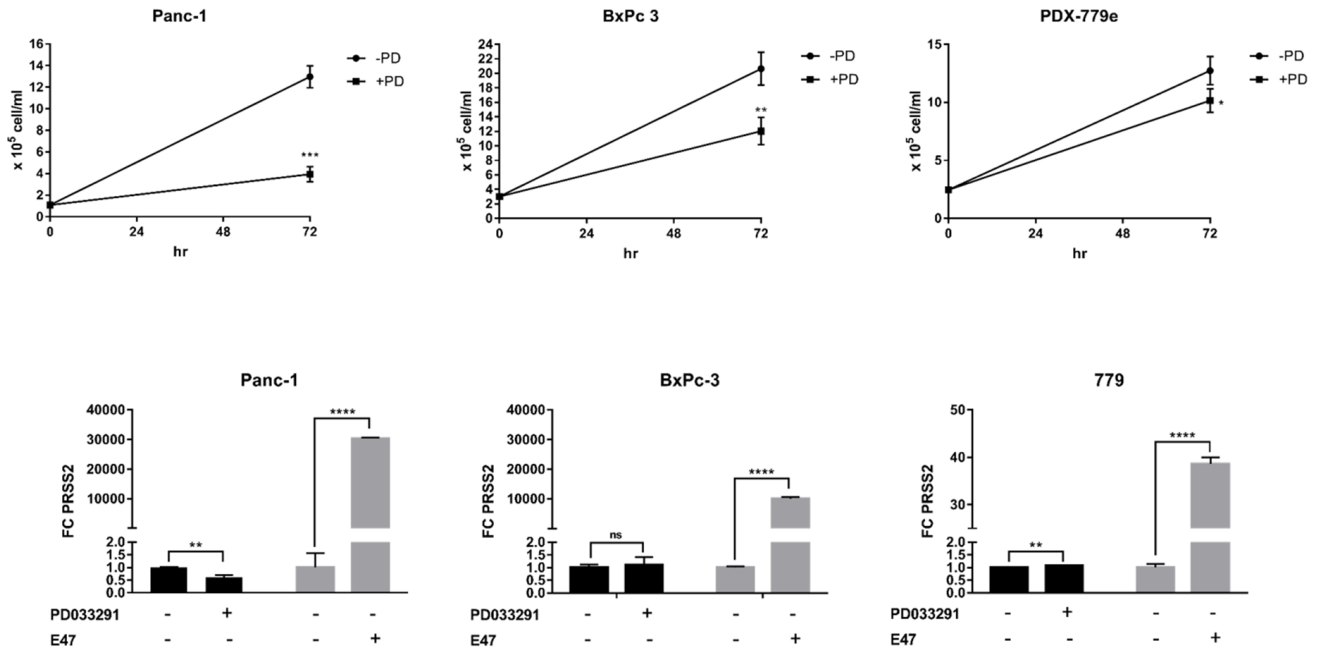

**Supplementary Figure 11: CDK Inhibition slows cell growth but does not induce trypsinogen expression.** PANC1, BxPC3, and 779e cells were treated with 1uM PD-0332991 for 72 hours. Each line exhibited slowed growth, but trypsinogen was not induced in any of the lines. PANC1/E47<sup>MER</sup> cells treated with 4uM tamoxifen served as a positive control for trypsinogen expression. \*p<0.05, \*\*p<0.01, \*\*\*p<0.001, \*\*\*\*p<0.0001.

Supplementary Table 1: PCR primers

| Gene              | Forward                    | Reverse                       |
|-------------------|----------------------------|-------------------------------|
| <i>18S</i>        | GATATGCTCATGTGGTGTG        | AATCTTCTTCAGTCGCTCCA          |
| <i>CCNA2</i>      | GCAAACAGTAAACAGCCTGCG      | TCAACTAACCAGTCCACGAGG         |
| <i>Top2A</i>      | CGCCTCCCTAACCTGATTGG       | ACCGTCTCCGTCCAGAAGAA          |
| <i>AURA</i>       | TCTAGTCCTCCTTAACCACTTATCT  | GAC ACA TGG CCT CTT CTG TAT C |
| <i>p21</i>        | GGATGTCCGTCAGAACCCAT       | CCCTCCAGTGGTGTCTCGGTG         |
| <i>PRSS2</i>      | GTTGCAGCTGCTGTTGCTGCC      | TGTCATTGTCCAGAGTCCGGC         |
| <i>CELA3A</i>     | GGTCCCCTACAGCTGGCCCT       | GCCAGAAACAAAGCTGGTCACACC      |
| <i>CPA2</i>       | AGTGGGTTACACAAGCTACG       | AGAGGGCTTCCAGATACCTTG         |
| <i>E47</i>        | GAGGAGAAAGACCTGAGGGAC      | ACCTGACACCTTTTCCTCTTCT        |
| <i>Id1</i>        | AATCATGAAAGTCGCCAGTG       | ATGTCGTAGAGCAGCACGTTT         |
| <i>Id2</i>        | ATGAAAGCCTTCAGTCCCGT       | TTCCATCTTGCTCACCTTCTT         |
| <i>Id3</i>        | TCATCTCCAACGACAAAAGG       | ACCAGGTTTAGTCTCCAGGAA         |
| <i>Id4</i>        | TGAACAAGCAGGGCGACA         | CGTGCAAAGAAAGAATGAAAG         |
| <i>Mist1</i>      | CCAGCACTACCAGCAGCA         | AGGACTGGGCGCTAGGTG            |
| <i>Dec1</i>       | GGATCTCCTACCCGAACA         | TCTCCCTGACAGCTCACC            |
| <i>SREBP1</i>     | GCTGCTGACCGACATCGAA        | GGGTGGGTCAAATAGGCCAG          |
| <i>CENPA</i>      | GATTCTGCGATGCTGTCTGG       | CATGGTTGGTTCGCTAAACTGC        |
| <i>ORC1</i>       | CGATTGGCGCGAAGTTTCT        | CTTGTGGGGTAGTGTGCCAT          |
| <i>CDC6</i>       | CCGTAACCTGTTCTCCTCGT       | TAGGTTGTCATCGCCCAGAC          |
| <i>DHFR</i>       | CATGGTTGGTTCGCTAAACTGC     | GAGGTTGTGGTCATTCTCTGGAAATA    |
| <i>E-cadherin</i> | GCCCCGCCTTATGATTCTCTG      | CTCGCCGCCTCCGTACATGTC         |
| <i>Vimentin</i>   | GACAATGCGTCTCTGGCACGTCTT   | TCCTCCGCCTCCTGCAGGTTCTT       |
| <i>Slug</i>       | TGTTGCAGTGAGGGCAAGAA       | GACCTGGTTGCTTCAAGGA           |
| <i>Twist</i>      | GAGTCCGCAGTCTTACGAGG       | CTGCCCGTCTGGGAATCACT          |
| <i>cMYC</i>       | CCT ACC CTC TCA ACG ACA GC | CTC TGA CCT TTT GCC AGG AG    |
| <i>ATOH8</i>      | CAGGTGCCGTGCTACTCATA       | AGTCACTCCTTGCGCTTCTT          |
| <i>HES1</i>       | GACAGCATCTGAGCACAGAAATG    | GTCATGGCATTGATCTGGGTCAT       |
